# Supplementary material
Source: publisher figshare collection journal article supplement (https://sage.figshare.com/ndownloader/files/23899461)
Supplement: Supplementary file 1 [file 23899461]

**Appendix 2. Appearance of the Somnolter® device an example of the automated report.**

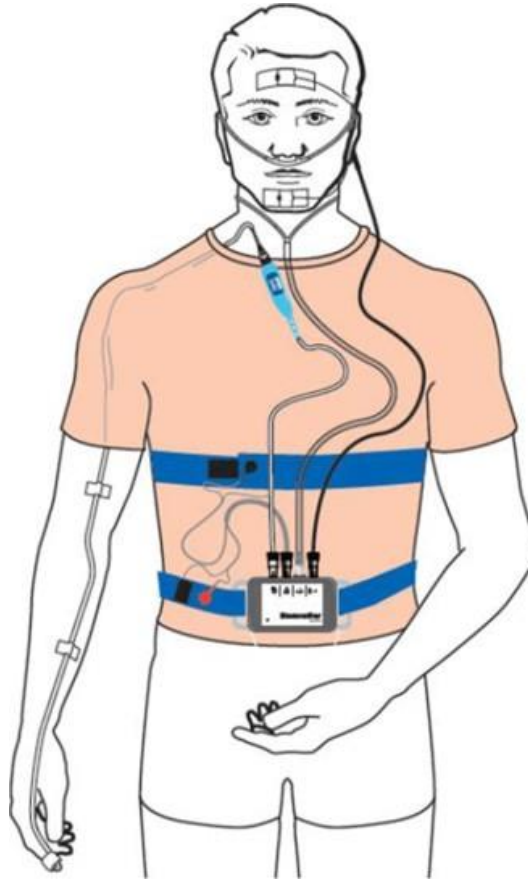

The device has the following sensors: (1) nasal thermal airflow sensor; (2) mandibular movement (JaWac) sensor; (3) finger pulseoxymetry sensor; and (4) respiratory inductances plethysmography (RIP) bands. The device is equipped with an internal position sensor.

*([www.nomics.be](http://www.nomics.be))*

## Example of Somnolter® automatic report.

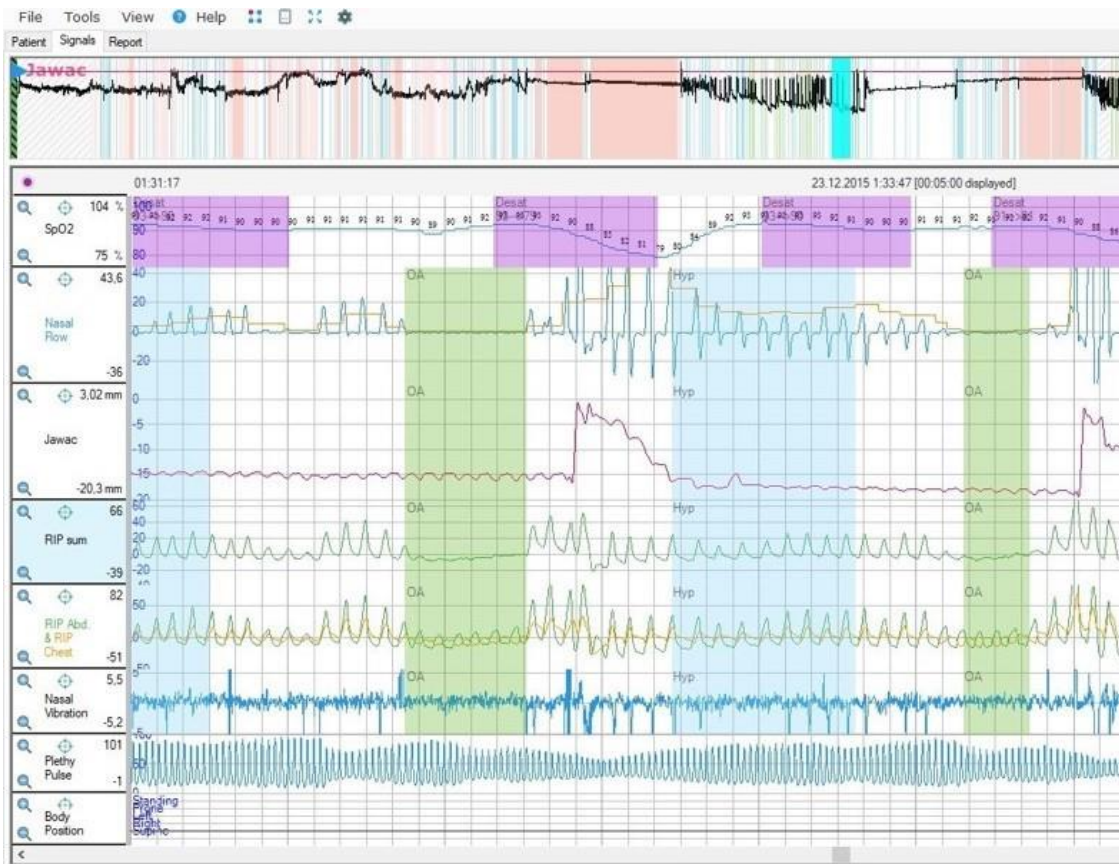

OA – obstructive apnoea: flow reduction  $\geq 90\%$  with chest wall (RIP) or mandibular (JaWac) movements. Event followed by oxygen desaturation and arousal.  
Hyp – obstructive hypopnea: flow reduction  $\geq 50\%$  and desaturation.  
Desaturation is a drop in SpO2  $\geq 3\%$  within 30 seconds.
